# Supplementary material for: Incident HIV infection has fallen rapidly in men who have sex with men in Melbourne, Australia (2013–2017) but not in the newly-arrived Asian-born
Source: Springer Nature journal article supplement (doi:10.1186/s12879-018-3325-0), 2018-08-20

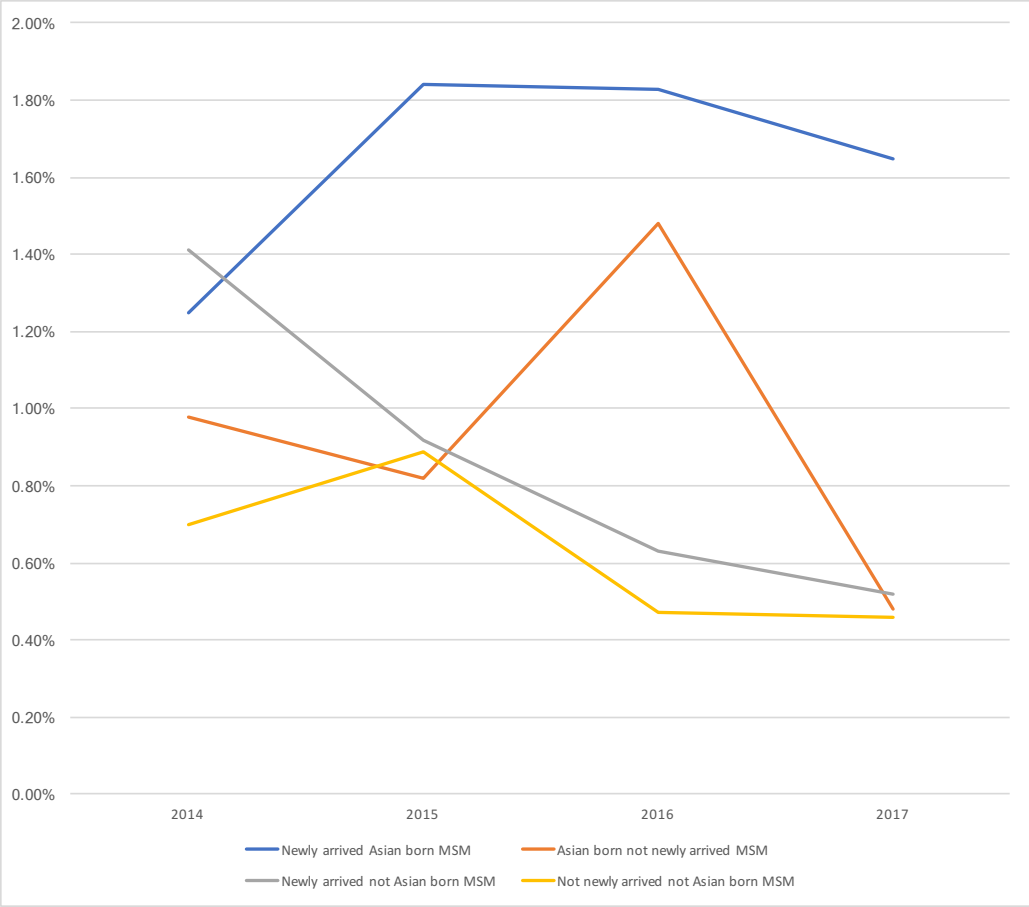

Supplement: MOESM2 [file 16057926]
